# Supplementary material for: Discovery of protein-based natural hydrogel from the girdle of the ‘sea cockroach’ Chiton articulatus (Chitonida: Chitonidae)
Source: PeerJ. 2022 May 9;10:e13386. doi: 10.7717/peerj.13386 (PMC9097651; doi:10.7717/peerj.13386)
Supplement: Supplemental Information 1 [file peerj-10-13386-s001.xlsx]

## Sheet: swelling
		minute	dH2O	NaCl	CaCl2	MgCl2	FeCl3
		30	1207	175	125	200	300
		60	1150	200	225	266	400
		90	1066	175	200	333	350
		120	1050	150	200	333	300
		150	1034	300	300	400	450
		180	1000	325	250	300	450
		240	935	200	350	233	400
		300	883	200	250	226	400
		360	850	175	200	300	350
		420	800	225	250	266	350
Swelling ratio (%)= (Ws-Wd)/Wd*100%

## Sheet: reswelling
		Water	reswelling	(ws1-wd1)/wd1*100
		Ws1	0.17	1033.33
		Wd1	0.015	933
		Ws2	0.215	680
		Wd2	0.05	573
		Ws3	0.212	546
		Wd3	0.05
		Ws4	0.169
		Wd4	0.05
		Ws5	0.149
		Wd5	0.05
Wd and Ws are the weight of the dry and swollen samples, respectively
		NaCl	reswelling	(ws1-wd1)/wd1*100
		Ws2	0.115	339
		Wd2	0.023	308
		Ws3	0.101	265
		Wd3	0.023	256
		Ws4	0.094	213
		Wd4	0.023
		Ws5	0.082
		Wd5	0.023

## Sheet: water retention
			Ws=0.36	Wd=0.04
		hour		30 degree	50 degree	80 degree
		1	0.33	94	91	81
		2	0.3	81.3	76	62
		3	0.28	75	58	41
		4	0.25	66	44	17
		5	0.22	56	39.3	7
		6	0.2	50	33	0
		7	0.192	47.5	25
		8	0.018	44	21
		9	0.15	35	17
		10	0.13	32	10
WR= water retention %
Wd=the weight of the dry sample
Ws=the weight of the swollen sample
WR(%)= (Wt-Wd)/(Ws-Wd)*100%
