# Supplementary material for: Discovery of protein-based natural hydrogel from the girdle of the ‘sea cockroach’ Chiton articulatus (Chitonida: Chitonidae)
Source: PeerJ. 2022 May 9;10:e13386. doi: 10.7717/peerj.13386 (PMC9097651; doi:10.7717/peerj.13386)
Supplement: Supplemental Information 2 [file peerj-10-13386-s002.xlsx]

## Sheet: Worksheet
	Control	Control	Control	1 mg	1 mg	1 mg	2 mg	2 mg	2 mg	4 mg	4 mg	4 mg
24 h	100,0	100,0	100,00	124,18	114,27	134,15	112,20	80,13	102,13	93,16	82,16	73,70
48 h	100,0	100,0	100,00	130,16	140,89	125,78	74,14	84,13	62,11	18,89	18,99	28,56
72 h	100,0	100,0	100,00	147,33	157,18	130,10	63,12	70,19	55,65	22,40	10,11	27,89
